# Supplementary material
Source: MDPI journal article supplement (https://www.mdpi.com/1424-8247/16/3/416)

| All Survey Participants |                |           |                                                    |                                  |                          |
|-------------------------|----------------|-----------|----------------------------------------------------|----------------------------------|--------------------------|
| No.                     | City           | Country   | Affiliated Department                              | Primary Speciality               | Patients under treatment |
| 1                       | Venice         | Italy     | Center for Rare Diseases                           | inherited metabolic diseases     | 21 - 50                  |
| 2                       | Mainz          | Germany   | Pediatrics, Cardiology, inherited Cardiomyopathies | Cardiology                       | > 100                    |
| 3                       | Heidelberg     | Germany   | Genetics                                           | Medical Genetics                 | 51 - 100                 |
| 4                       | Salzburg       | Austria   | Pediatrics                                         | inherited metabolic diseases     | 11 - 20                  |
| 5                       | Weillmunester  | Germany   | Pediatrics                                         | neuropediatrics                  | > 100                    |
| 6                       | Barcelona      | Spain     | n.a.                                               | n.a.                             | 21 - 50                  |
| 7                       | Stanford       | USA       | Pediatrics                                         | Endocrinology and metabolism     | 11-20                    |
| 8                       | Ermesinde      | Portugal  | Pediatrics                                         | Pediatrics                       | < 10                     |
| 9                       | Porto          | Portugal  | Pediatrics                                         | Inherited metabolic diseases     | 21 - 50                  |
| 10                      | Monza          | Italy     | Pediatrics                                         | Inherited metabolic diseases     | 51 - 100                 |
| 11                      | Stuttgart      | Germany   | Pediatrics                                         | Suregeon                         | 51 - 100                 |
| 12                      | Teo            | Spain     | Pediatrics                                         | Inherited metabolic diseases     | 11 - 20                  |
| 13                      | Coimbra        | Portugal  | Pediatrics                                         | n.a.                             | < 10                     |
| 14                      | Berlin         | Germany   | Endocrinology                                      | Endocrinology, Internal medicine | < 10                     |
| 15                      | Innsbruck      | Austria   | Pediatrics                                         | Inherited metabolic diseases     | < 10                     |
| 16                      | Vienna         | Austria   | Pediatrics                                         | inherited metabolic diseases     | 11 - 20                  |
| 17                      | Quito          | Ecuador   | genetics                                           | clinical genetics                | < 10                     |
| 18                      | Buenos Aires   | Argentina | Pediatrics                                         | IEM                              | 21 - 50                  |
| 19                      | Medelin        | Colombia  | Pediatrics                                         | Neuropediatrics                  | 11 - 20                  |
| 20                      | Belem          | Brazil    | Genetics                                           | Laboratory Assitent              | n.a.                     |
| 21                      | Rio de Janeiro | Brazil    | Genetics                                           | clinical genetics, pediatrics    | 21 - 50                  |
| 22                      | Rio de Janeiro | Brazil    | Genetics                                           | Medical Genetics                 | < 10                     |
| 23                      | Lima           | Peru      | Pediatrics                                         | IEM                              | 11 - 20                  |
| 24                      | Vienna         | Austria   | Internal medicine                                  | inherited metabolic diseases     | 21 - 50                  |
| 25                      | Milan          | Italy     | Pediatrics                                         | IEM                              | 21 - 50                  |
| 26                      | Hannover       | Germany   | Pediatrics                                         | LSD                              | 21 - 50                  |
| 27                      | Bochum         | Germany   | Pediatrics                                         | Neuropediatrics                  | < 10                     |
| 28                      | Reutlingen     | Germany   | Pediatrics                                         | Inherited metabolic diseases     | 11 - 20                  |

| Participants Included in the Analysis |              |
|---------------------------------------|--------------|
| Country/ region                       | Participants |
| Italy                                 | 3            |
| Germany                               | 8            |
| Austria                               | 4            |
| Spain                                 | 2            |
| USA                                   | 1            |
| Portugal                              | 3            |
| Ecuador                               | 1            |
| Argentina                             | 1            |
| Colombia                              | 1            |
| Brazil                                | 2            |
| Peru                                  | 1            |
| Europe                                | 20           |
| USA                                   | 1            |
| South America                         | 6            |
| total                                 | 27           |

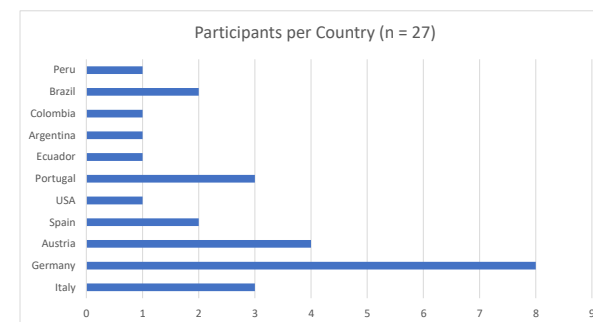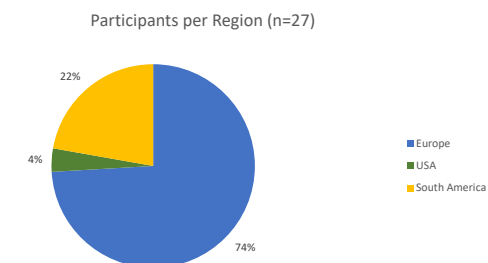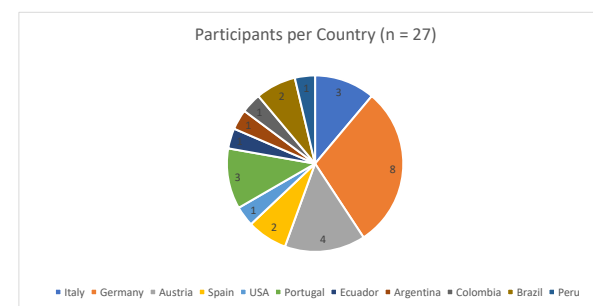

Supplement: s1 [file s1]
